# Supplementary material for: Shape tailored Ni3(NO3)2(OH)4nano-flakes simulating 3-D bouquet-like structures for supercapacitors: exploring the effect of electrolytes on stability and performance
Source: Royal Society of Chemistry journal article supplement (doi:10.1039/c4ra05054a), 2014-01-01
Supplement: c4ra05054a1.pdf [file c4ra05054a1.pdf]

**Supporting Information (SI)-I**

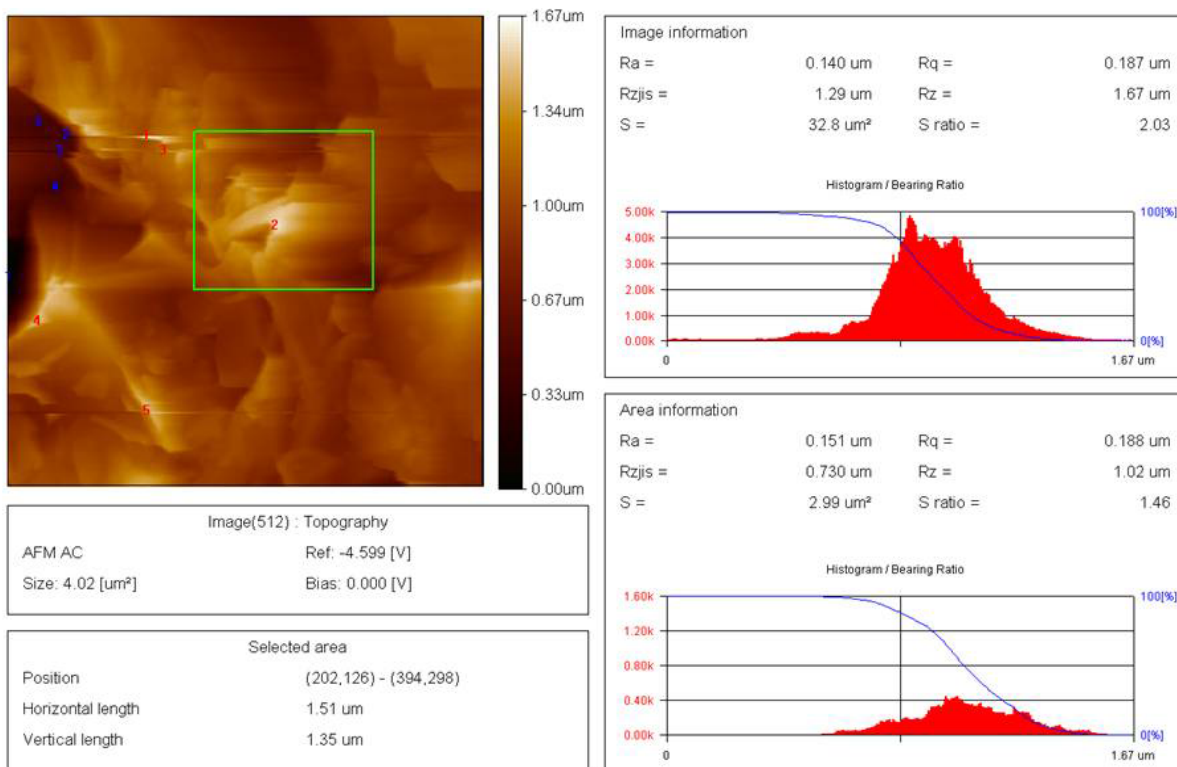

Figure SI-I. AFM images of N-24 electrode surface

*SI-II*

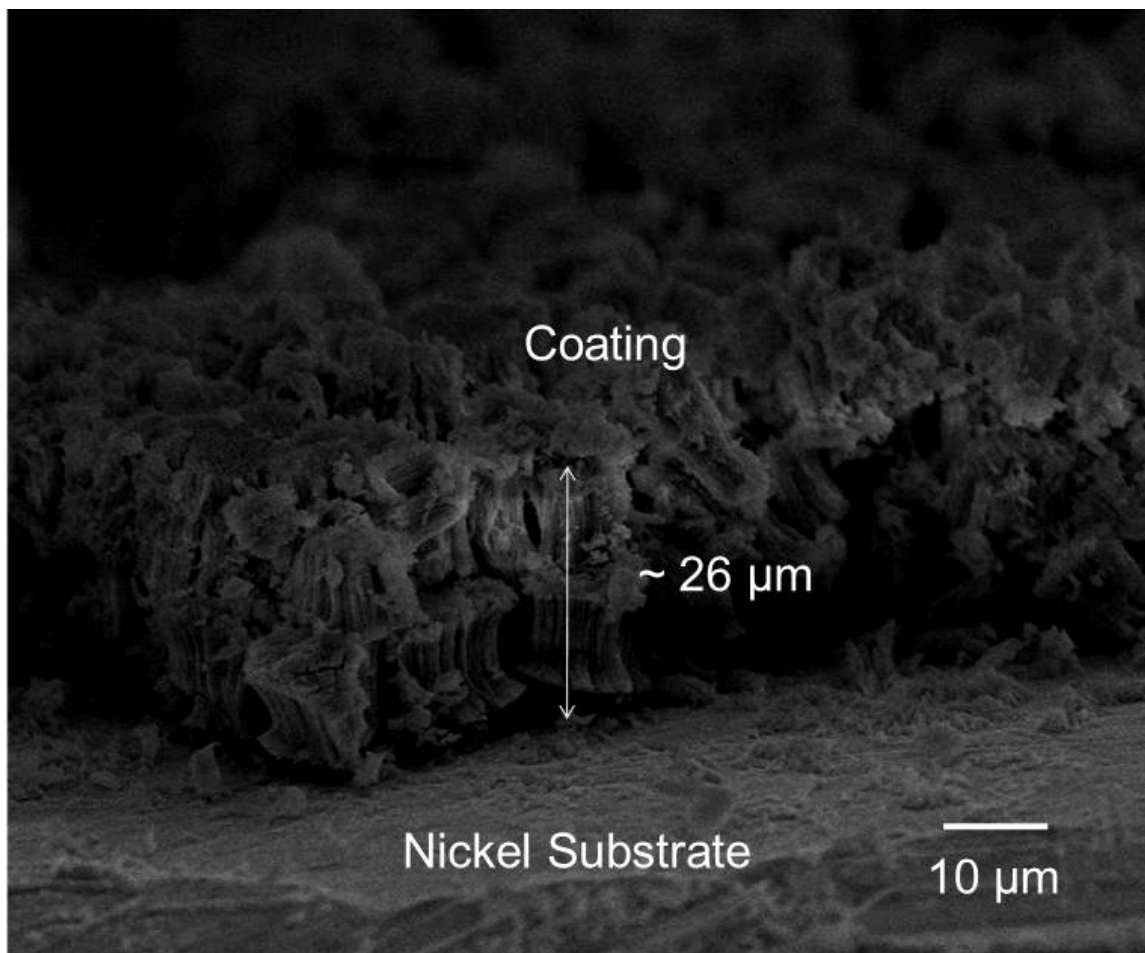

Figure SI-II. SEM image showing thickness of N-24 electrode.
